# Supplementary material for: Modulation of Cell Surface Receptor Expression by Modified Vaccinia Virus Ankara in Leukocytes of Healthy and HIV-Infected Individuals
Source: PubMed Central journal article supplement (PMC7506042; doi:10.3389/fimmu.2020.02096), 2020-09-08
Supplement: Data_Sheet_1.pdf [file Data_Sheet_1.pdf]

# Modulation of cell surface receptor expression by modified vaccinia virus Ankara in leukocytes of healthy and HIV-infected individuals

## *Supplementary materials*

**Adrien Leite Pereira<sup>1</sup>, Quentin Jouhault<sup>1</sup>, Ernesto Marcos Lopez<sup>1</sup>, Antonio Cosma<sup>1</sup>, Olivier Lambotte<sup>1,2,3</sup>, Roger Le Grand<sup>1</sup>, Michael H. Lehmann<sup>4,\*</sup>, Nicolas Tchitchek<sup>1,\*</sup>**

<sup>1</sup>CEA – Université Paris Sud 11 – INSERM U1184, Immunology of Viral Infections and Autoimmune Diseases, IDMIT Infrastructure, 92265 Fontenay-aux-Roses, France

<sup>2</sup>Inserm, U1184, Center for immunology of Viral Infections and Autoimmune Diseases, 94276 Le Kremlin-Bicêtre, France.

<sup>3</sup>APHP, Hôpitaux Universitaires Paris Saclay, Service de Médecine Interne-Immunologie Clinique, 94276 Le Kremlin-Bicêtre, France.

<sup>4</sup>Institute for Infectious Diseases and Zoonoses, Ludwig-Maximilians-Universität München, 80539 Munich, Germany

**\* Correspondence:**

Nicolas Tchitchek  
nicolas.tchitchek@sorbonne-universite.fr

Michael H. Lehmann  
Michael.Lehmann@lmu.de  
Orlataler@web.de

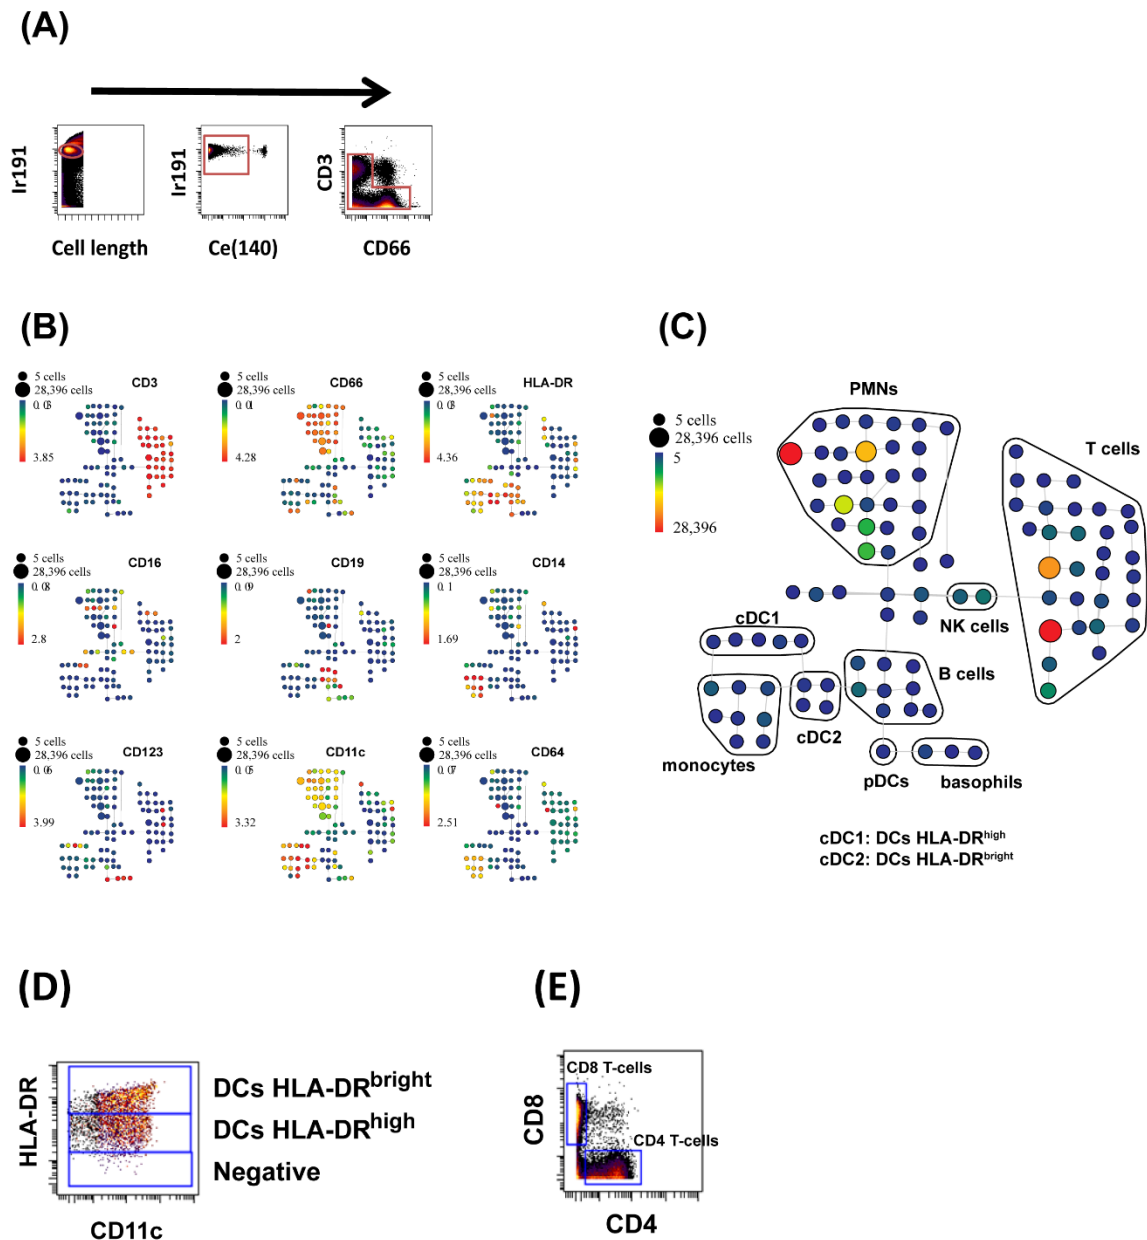

**Supplementary Figure 1. Annotation of cell clusters identified by SPADE.** (A) Samples were manually gated to exclude the EQTM Four-Element Calibration Beads, select singlets, and gate out nonspecific background generated by metal-conjugated Ab-binding eosinophils. (B) SPADE analysis was performed to identify 100 cell clusters using a 5% down-sampling parameter. Clustering was based on the levels of CD3, CD4, CD8, CD11c, CD14, CD16, CD19, CD32, CD64, CD66, CD123, HLA-DR, NKp80, and Perforin. The median expression of HLA-DR, CD3, CD11c, CD14, CD16, CD19, CD64, CD66, and CD123 were overlaid on the generated SPADE tree to annotate each cluster. (C) Eight leukocyte populations were identified based on the median expression of these specific markers. Granulocytes were designated as CD66<sup>+</sup>, T-cells as CD3<sup>+</sup>, NK cells as HLA-DR<sup>-</sup> CD16<sup>+</sup>, basophils as HLA-DR<sup>-</sup> CD123<sup>+</sup>, B-cell as HLA-DR<sup>+</sup> CD19<sup>+</sup>, monocytes as HLA-DR<sup>+</sup> CD14<sup>+/-</sup> CD64<sup>+</sup>, conventional dendritic cells (cDC) as HLA-DR<sup>+</sup> CD11c<sup>+</sup> CD14<sup>-</sup> CD64<sup>-</sup>, and plasmacytoid dendritic cells (pDC) as HLA-DR<sup>+</sup> CD123<sup>+</sup>. Thereafter, each of these eight cell populations was independently and computationally isolated. (D) Conventional dendritic cells were divided into two categories based on their HLA-DR levels: HLA-DR<sup>high</sup> DCs and HLA-DR<sup>bright</sup> DCs. (E) T-cells were divided into two categories based on their CD4/CD8 expression.

(A)

### Control Condition

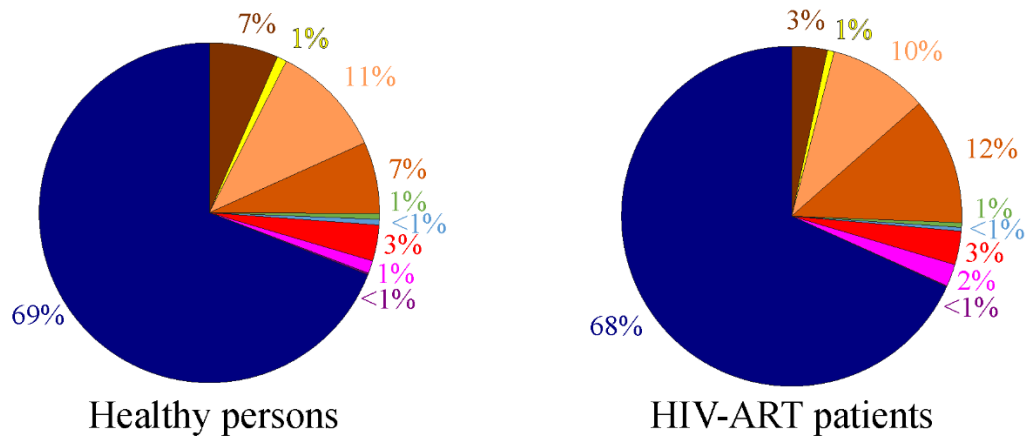

(B)

### MVA infection

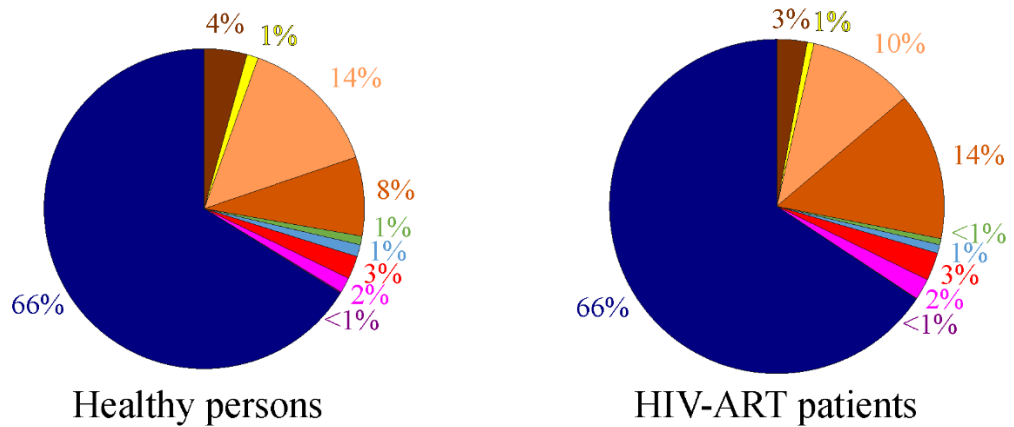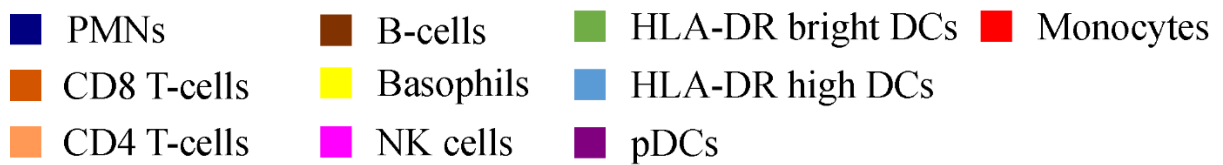

**Supplementary Figure 2. Percentages of each cell type isolated from healthy persons and HIV-ART patients.** Each pie chart represents the percentages of leukocyte populations isolated from the SPADE analysis for the whole set of healthy persons and HIV-ART patients in control condition (A) and after infection with MVA (B).
